# Supplementary material
Source: MDPI journal article supplement (https://www.mdpi.com/1999-4907/9/12/744)
Supplement: s1 [file s1]

# Supplementary Materials

**Table S1.** The 66 nonnative pest (insect and pathogen) species across the conterminous United States used in this study. The list includes species that are known to cause significant ecological and economical damage to native forest tree species.

| Scientific_Name                   | Common_name                        | Group                  | Notes                              |
|-----------------------------------|------------------------------------|------------------------|------------------------------------|
| <i>Acantholyda erythrocephala</i> | Pine False Webworm                 | Foliage-Feeders        |                                    |
| <i>Adelges abietis</i>            | Eastern Spruce Gall Adelgid        | Sap-Feeders            |                                    |
| <i>Adelges piceae</i>             | Balsam Woolly Adelgid              | Sap-Feeders            |                                    |
| <i>Adelges tsugae</i>             | Hemlock Woolly Adelgid             | Sap-Feeders            |                                    |
| <i>Agrilus planipennis</i>        | Emerald Ash Borer                  | Phloem- or Wood-Borers |                                    |
| <i>Agrilus prionurus</i>          | Soapberry Borer                    | Phloem- or Wood-Borers |                                    |
| <i>Anoplophora glabripennis</i>   | Asian Longhorned Beetle            | Phloem- or Wood-Borers |                                    |
| <i>Callidellum rufipenne</i>      | Japanese Cedar Longhorn Beetle     | Phloem- or Wood-Borers |                                    |
| <i>Carulaspis juniperi</i>        | Juniper Scale                      | Sap-Feeders            |                                    |
| <i>Cephalcia lariciphila</i>      | European Web-spinning Larch Sawfly | Foliage-Feeders        |                                    |
| <i>Ceratocystis fagacearum</i>    | Oak Wilt                           | Pathogens              | pathogen                           |
| <i>Coleophora laricella</i>       | Larch Casebearer                   | Foliage-Feeders        |                                    |
| <i>Contarinia baeri</i>           | European Pine Needle Midge         | Foliage-Feeders        | Christmas tree pest, generalist    |
| <i>Cronartium ribicola</i>        | White Pine Blister Rust            | Pathogens              | pathogen                           |
| <i>Cryphonectria parasitica</i>   | Chestnut Blight                    | Pathogens              | pathogen                           |
| <i>Cryptococcus fagisuga</i>      | Beech Scale                        | Sap-Feeders            | causal agent of beech bark disease |
| <i>Cryptodiaporthe populea</i>    | Dothichiza Canker of Poplar        | Pathogens              | pathogen                           |
| <i>Cryptorhynchus lapathi</i>     | Poplar-And-Willow Borer            | Phloem- or Wood-Borers |                                    |
| <i>Cyrtepidomus castaneus</i>     | Asiatic Oak Weevil                 | Foliage-Feeders        |                                    |
| <i>Diprion similis</i>            | Introduced Pine Sawfly             | Foliage-Feeders        |                                    |
| <i>Discula destructiva</i>        | Dogwood Anthracnose                | Pathogens              | pathogen                           |
| <i>Elatobium abietinum</i>        | Spruce Aphid                       | Sap-Feeders            |                                    |
| <i>Enarmonia formosana</i>        | Cherry Bark Tortrix                | Foliage-Feeders        |                                    |
| <i>Epinotia nanana</i>            | European Spruce Needleminer        | Foliage-Feeders        |                                    |
| <i>Eulecanium cerasorum</i>       | Calico Scale                       | Sap-Feeders            | ornamental hosts; generalist       |

|                                   |                                            |                        |                              |
|-----------------------------------|--------------------------------------------|------------------------|------------------------------|
| <i>Euproctis chrysorrhoea</i>     | Browntail Moth                             | Foliage-Feeders        |                              |
| <i>Fenusa pumila</i>              | Birch Leafminer                            | Foliage-Feeders        | syn. w. <i>F. pusilla</i>    |
| <i>Fiorinia externa</i>           | Elongate Hemlock Scale                     | Sap-Feeders            |                              |
| <i>Gremmeniella abietina</i>      | Scleroderis Canker                         | Pathogens              | pathogen                     |
| <i>Homadula anisocentra</i>       | Mimosa Webworm                             | Foliage-Feeders        |                              |
| <i>Hylurgus ligniperda</i>        | Redhaired Pine Bark Beetle                 | Phloem- or Wood-Borers |                              |
| <i>Kaliopenusa ulmi</i>           | Elm Leafminer                              | Foliage-Feeders        |                              |
| <i>Lachnellula willkommii</i>     | European Larch Canker                      | Pathogens              | pathogen                     |
| <i>Lepidosaphes ulmi</i>          | Oystershell Scale                          | Sap-Feeders            | ornamental hosts; generalist |
| <i>Leucoma salicis</i>            | Satin Moth                                 | Foliage-Feeders        | poplar and willow hosts      |
| <i>Lymantria dispar</i>           | Gypsy Moth                                 | Foliage-Feeders        |                              |
| <i>Maconellicoccus hirsutus</i>   | Pink Hibiscus Mealybug                     | Sap-Feeders            | ornamental hosts; generalist |
| <i>Matsucoccus matsumurae</i>     | Red Pine Scale                             | Sap-Feeders            | syn. w. <i>M. resinosae</i>  |
| <i>Melampsora larici-populina</i> | Eurasian Poplar Leaf Rust                  | Pathogens              | pathogen                     |
| <i>Neodiprion sertifer</i>        | European Pine Sawfly                       | Foliage-Feeders        |                              |
| <i>Nuculaspis tsugae</i>          | Circular Hemlock Scale                     | Sap-Feeders            |                              |
| <i>Operophtera brumata</i>        | Winter Moth                                | Foliage-Feeders        |                              |
| <i>Ophiostoma novo-ulmi</i>       | Dutch Elm Disease                          | Pathogens              | pathogen                     |
| <i>Orchestes alni</i>             | European Elm Flea Weevil                   | Foliage-Feeders        | elm hosts, prefers exotics   |
| <i>Orthotomicus erosus</i>        | Mediterranean Pine Engraver                | Phloem- or Wood-Borers |                              |
| <i>Otiorhynchus sulcatus</i>      | Black Vine Weevil                          | Foliage-Feeders        | ornamental hosts; generalist |
| <i>Phytophthora cinnamomi</i>     | Littleleaf Disease / Phytophthora Root Rot | Pathogens              | pathogen                     |
| <i>Phytophthora lateralis</i>     | Port-Orford-Cedar Root Disease             | Pathogens              | pathogen                     |
| <i>Phytophthora ramorum</i>       | Sudden Oak Death                           | Pathogens              | pathogen                     |
| <i>Plagiodera versicolora</i>     | Imported Willow Leaf Beetle                | Foliage-Feeders        |                              |
| <i>Popillia japonica</i>          | Japanese Bbeetle                           | Foliage-Feeders        | ornamental hosts; generalist |
| <i>Pristiphora erichsonii</i>     | Larch Sawfly                               | Foliage-Feeders        |                              |
| <i>Pristiphora geniculata</i>     | Mountain-Ash Sawfly                        | Foliage-Feeders        |                              |
| <i>Profenusa thomsoni</i>         | Ambermarked Birch Leafminer                | Foliage-Feeders        |                              |
| <i>Raffaelea lauricola</i>        | Laurel Wilt                                | Pathogens              |                              |
| <i>Rhyacionia buoliana</i>        | European Pine Shoot Moth                   | Foliage-Feeders        |                              |

|                                            |                                  |                        |                            |
|--------------------------------------------|----------------------------------|------------------------|----------------------------|
| <i>Scolytus multistriatus</i>              | Smaller European Elm Bark Beetle | Phloem- or Wood-Borers |                            |
| <i>Scolytus schevyrewi</i>                 | Banded Elm Bark Beetle           | Phloem- or Wood-Borers |                            |
| <i>Sirex noctilio</i>                      | Sirex Woodwasp                   | Phloem- or Wood-Borers |                            |
| <i>Sirococcus clavigignenti-juglandace</i> | Butternut Canker                 | Pathogens              | pathogen                   |
| <i>Taeniothrips inconsequens</i>           | Pear Thrips                      | Sap-Feeders            |                            |
| <i>Thrips calcaratus</i>                   | Introduced Basswood Thrips       | Sap-Feeders            |                            |
| <i>Tomicus piniperda</i>                   | Pine Shoot Beetle                | Phloem- or Wood-Borers |                            |
| <i>Trichiocampus viminalis</i>             | Poplar Sawfly                    | Foliage-Feeders        |                            |
| <i>Venturia saliciperda</i>                | Willow Scab                      | Pathogens              | pathogen                   |
| <i>Xanthogaleruca luteola</i>              | elm leaf beetle                  | Foliage-Feeders        | elm hosts, prefers exotics |

---

**Table S2.** Aggregation of 16 land cover classes to the five classes used in this study.

| Land cover class             | Class description [16,17]                                                                                                                                                                                                                                                                                                                                               | Aggregated class |
|------------------------------|-------------------------------------------------------------------------------------------------------------------------------------------------------------------------------------------------------------------------------------------------------------------------------------------------------------------------------------------------------------------------|------------------|
| Open water                   | Areas of open water, generally with less than 25% cover of vegetation or soil.                                                                                                                                                                                                                                                                                          | Other            |
| Perennial ice/snow           | Areas characterized by a perennial cover of ice and/or snow, generally greater than 25% of total cover.                                                                                                                                                                                                                                                                 | Other            |
| Developed, open space        | Areas with a mixture of some constructed materials, but mostly vegetation in the form of lawn grasses. Impervious surfaces account for less than 20% of total cover. These areas most commonly include large-lot single-family housing units, parks, golf courses, and vegetation planted in developed settings for recreation, erosion control, or aesthetic purposes. | Developed        |
| Developed, low intensity     | Areas with a mixture of constructed materials and vegetation. Impervious surfaces account for 20% to 49% percent of total cover. These areas most commonly include single-family housing units.                                                                                                                                                                         | Developed        |
| Developed, medium intensity  | Areas with a mixture of constructed materials and vegetation. Impervious surfaces account for 50% to 79% of the total cover. These areas most commonly include single-family housing units.                                                                                                                                                                             | Developed        |
| Developed, high intensity    | Highly developed areas where people reside or work in high numbers. Examples include apartment complexes, row houses, and commercial/industrial. Impervious surfaces account for 80% to 100% of the total cover.                                                                                                                                                        | Developed        |
| Barren land (rock/sand/clay) | Areas of bedrock, desert pavement, scarps, talus, slides, volcanic material, glacial debris, sand dunes, strip mines, gravel pits, and other accumulations of earthen material. Generally, vegetation accounts for less than 15% of total cover.                                                                                                                        | Other            |
| Deciduous forest             | Areas dominated by trees generally greater than five meters tall, and greater than 20% of total vegetation cover. More than 75% of the tree species shed foliage simultaneously in response to seasonal change.                                                                                                                                                         | Forest           |
| Evergreen forest             | Areas dominated by trees generally greater than five meters tall, and greater than 20% of total vegetation cover. More than 75% of the tree species maintain their leaves all year. Canopy is never without green foliage.                                                                                                                                              | Forest           |
| Mixed forest                 | Areas dominated by trees generally greater than five meters tall, and greater than 20% of total vegetation cover. Neither deciduous nor evergreen species are greater than 75% of total tree cover.                                                                                                                                                                     | Forest           |
| Shrub/scrub                  | Areas dominated by shrubs; less than five meters tall with shrub canopy typically greater than 20% of total vegetation. This class includes true shrubs, young trees in an early successional stage, or trees stunted from environmental conditions.                                                                                                                    | Grass-shrub      |
| Grassland/herbaceous         | Areas dominated by graminoid or herbaceous vegetation, generally greater than 80% of total vegetation. These areas are not subject to intensive management such as tilling, but can be utilized for grazing.                                                                                                                                                            | Grass-shrub      |
| Pasture/hay                  | Areas of grasses, legumes, or grass-legume mixtures planted for livestock grazing or the production of seed or hay crops, typically on a perennial cycle. Pasture/hay vegetation accounts for greater than 20% of total vegetation.                                                                                                                                     | Agricultural     |
| Cultivated crops             | Areas used for the production of annual crops, such as corn, soybeans, vegetables, tobacco, and cotton, and also perennial                                                                                                                                                                                                                                              | Agricultural     |

|                              |                                                                                                                                                                                      |        |
|------------------------------|--------------------------------------------------------------------------------------------------------------------------------------------------------------------------------------|--------|
|                              | woody crops such as orchards and vineyards. Crop vegetation accounts for greater than 20% of total vegetation. This class also includes all land being actively tilled.              |        |
| Woody wetlands               | Areas where forest or shrubland vegetation account for greater than 20% of vegetative cover, and where the soil or substrate is periodically saturated with or covered with water.   | Forest |
| Emergent herbaceous wetlands | Areas where perennial herbaceous vegetation accounts for greater than 80% of vegetative cover, and where the soil or substrate is periodically saturated with or covered with water. | Other  |

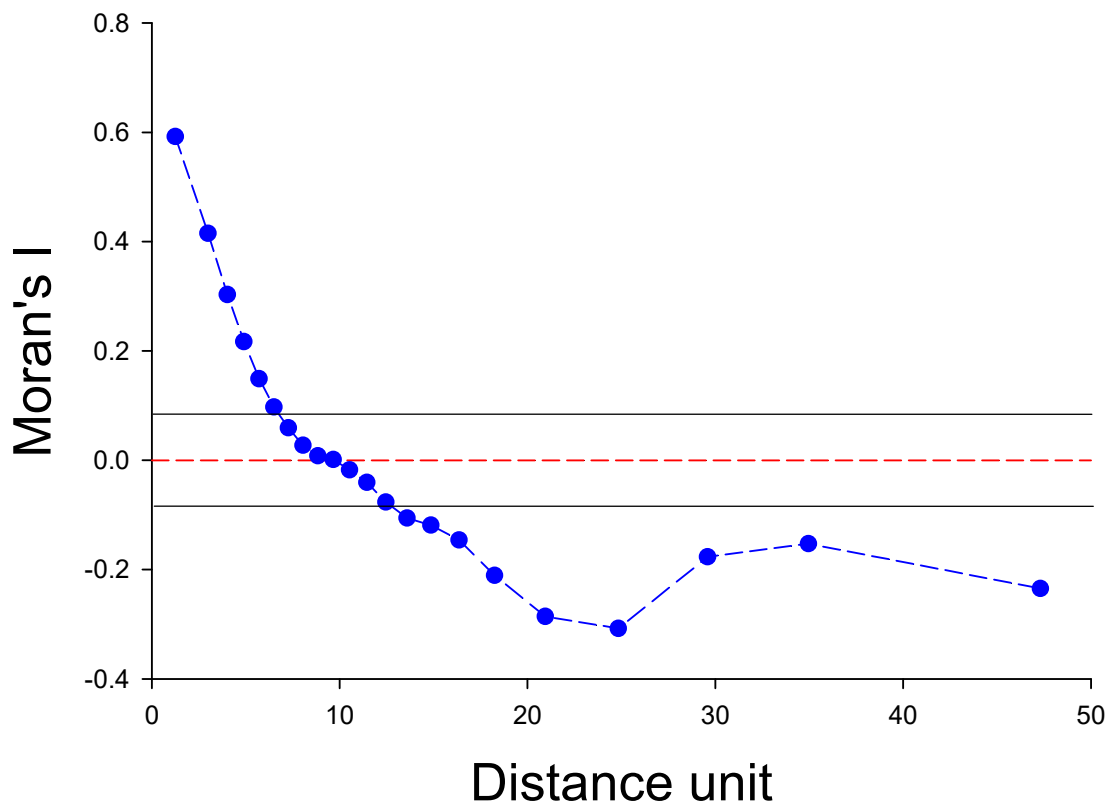

**Figure S1.** Spatial autocorrelation analyses showed that the forest pest richness was spatially autocorrelated across the conterminous United States. The data points above the upper or below the lower horizontal lines indicate significant spatial autocorrelations based on randomization (i.e.,  $p < 0.05$ ), using the Monte Carlo randomized data (distances; 200 replicates).
